# Supplementary material
Source: HighWire-hosted journal article supplement (http://erj.ersjournals.com/highwire/filestream/113259/field_highwire_adjunct_files/1/Residual_Sleep_Apnea_with_AutoCPAP_ERJ_Supplementary_Material_Table_S1_and_Legends_2nd_Submission.pdf)
Supplement: Residual_Sleep_Apnea_with_AutoCPAP_ERJ_Supplementary_Material_Table_S1_and_Legends_2nd_Submission.pdf [file Residual_Sleep_Apnea_with_AutoCPAP_ERJ_Supplementary_Material_Table_S1_and_Legends_2nd_Submission.pdf]

Residual sleep disordered breathing during auto-titrating positive airway pressure therapy

Angela L. Denotti, Keith K.H. Wong, George C. Dungan II, John W. Gilholme, Nathaniel S. Marshall and Ronald R. Grunstein

"Online Depository – Supplementary Data"

Figure S1. Visual representation of airflow traces recorded at the different flow measurement sites.

Table S1. Polysomnographic data from auto-titrating and sub-therapeutic nights.

**Table S1. Polysomnographic data from auto-titrating and sub-therapeutic nights**

| Polysomnography variable                                                  | Auto-titrating night |                 | Sub-therapeutic night |                 | <i>p-value</i> |
|---------------------------------------------------------------------------|----------------------|-----------------|-----------------------|-----------------|----------------|
|                                                                           | Mean (SD)            | Range (min-max) | Mean ± SD             | Range (min-max) |                |
| Time in bed (mins)                                                        | 463.7 (31.5)         | 366 - 532       | 461.2 (31)            | 366 – 519       | <i>ns</i>      |
| Total sleep time (mins)                                                   | 366.8 (53.3)         | 237.5 – 444.5   | 367.7 (55.4)          | 262 – 475       | <i>ns</i>      |
| Sleep efficiency (%)                                                      | 79 (9.6)             | 57 – 92.6       | 79.7 (10.1)           | 57 – 96.6       | <i>ns</i>      |
| Sleep latency (mins)                                                      | 15.4 (14.7)          | 1 – 79          | 15.6 (14.3)           | 2.5 – 61        | <i>ns</i>      |
| REM latency (mins)                                                        | 108.1 (65.3)         | 16 – 280        | 135.3 (99.6)          | 15.5 – 391      | <i>ns</i>      |
| REM sleep (%)                                                             | 21.7 (7.5)           | 9.7 – 40.4      | 19 (7.7)              | 2.8 – 39.3      | <i>ns</i>      |
| Supine sleep time (mins)                                                  | 225.2 (133.7)        | 11 - 460.5      | 220.6 (118.8)         | 39.5 – 472.2    | <i>ns</i>      |
| EEG arousal index (/h)                                                    | 21.1 (10.9)          | 4.9 – 44.4      | 23.1 (11.3)           | 1.9 – 40.9      | <i>ns</i>      |
| Total no. EEG arousals                                                    | 130.1 (73)           | 34 – 273        | 139.1 (68.1)          | 13 – 254        | <i>ns</i>      |
| >3% oxygen desaturation index (/h)                                        | 2.2 (3)              | 0 – 14.3        | 4.2 (6)               | 0 – 27          | *              |
| Minimum oxygen saturation (%)                                             | 90.4 (2.9)           | 84 – 95         | 89.2 (4.2)            | 76 – 94         | <i>ns</i>      |
| Periodic limb movements index (/hr)                                       | 4.8 (9.6)            | 0 - 43          | 4.1 (9.0)             | 0 - 41          | <i>ns</i>      |
| Pressure 95 <sup>th</sup> centile on autoCPAP report (cmH <sup>2</sup> O) | 11 (1.9)             | 7-15            | -                     | -               | -              |
| Median leak (L/sec)                                                       | 0.07 (0.08)          | 0.00 – 0.34     | 0.05 (0.08)           | 0.00 – 0.30     | <i>ns</i>      |

\*p=<0.05, †p=<0.001, ns=not significant REM = rapid eye movement, EEG =

electroencephalogram
